# Supplementary material for: A dual fluorescent/phosphorescent zincophosphite with interesting water adsorption and structural transformation properties
Source: Royal Society of Chemistry journal article supplement (doi:10.1039/c9dt02288k), 2019-01-01
Supplement: c9dt02288k1.pdf [file c9dt02288k1.pdf]

## Supporting Information

### **A dual fluorescent/phosphorescent zincophosphite with interesting water adsorption and structural transformation properties**

Chuan Chen,<sup>a</sup> Chia-Fang Hsieh,<sup>a</sup> Hsiu-Mei Lin,<sup>a</sup> Ying-Feng Hsu,<sup>b</sup> Jye-Shane Yang,<sup>b</sup>  
and Chih-Min Wang<sup>\*,a</sup>

<sup>a</sup> Institute of Bioscience and Biotechnology, National Taiwan Ocean University,  
Keelung, 202 (Taiwan).

<sup>b</sup> Department of Chemistry, National Taiwan University, Taipei, 106 (Taiwan).

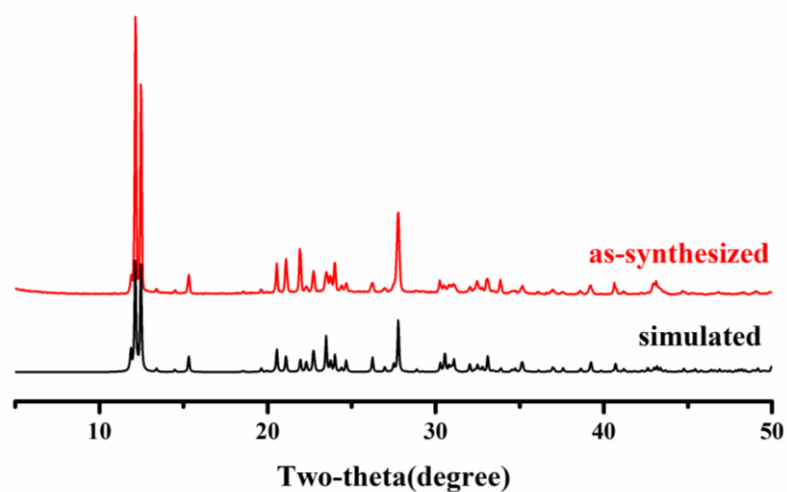

**Fig. S1** X-ray powder pattern of NTOU-6 (top). Powder pattern simulated on the basis of the atomic coordinates derived by single-crystal X-ray diffraction (bottom).

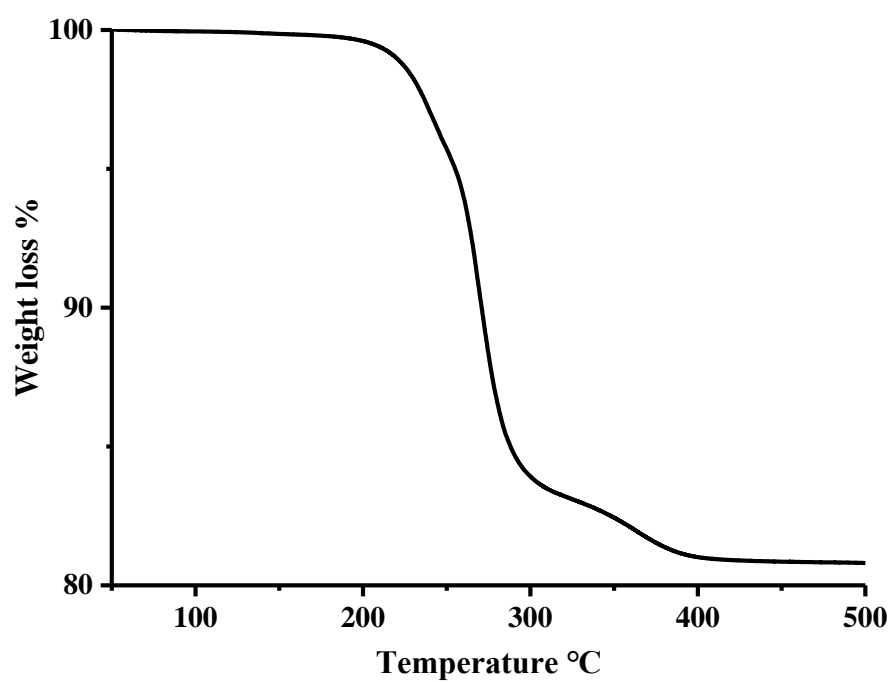

**Fig. S2** TGA curve for NTOU-6 in N<sub>2</sub> at 5 °C min<sup>-1</sup> from 40 to 550°C.

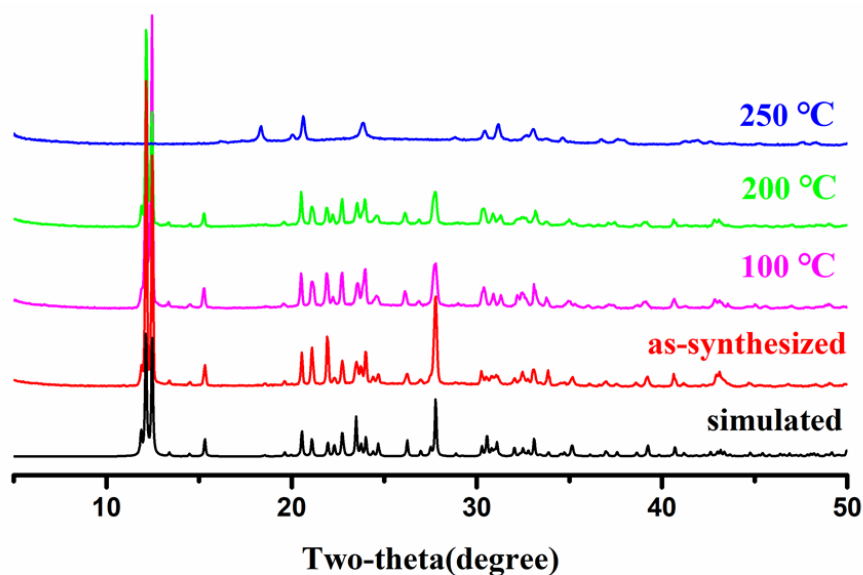

**Fig. S3** X-ray powder patterns of **NTOU-6** for thermal-stability testing: simulated, as-synthesized, holding for 1 h at 100°C, 200°C, and 250°C.

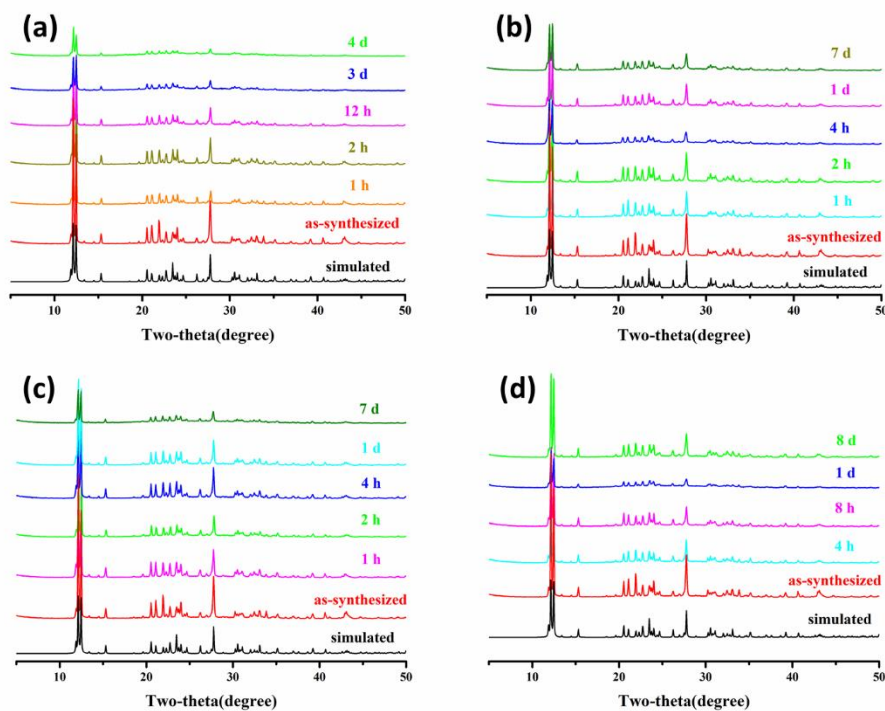

**Fig. S4** X-ray powder patterns of **NTOU-6** for chemical-stability studies conducted by suspending the powder samples in organic solvents for several days: (a) hexane, (b) ethanol, (c) methanol, and (d) DMF.

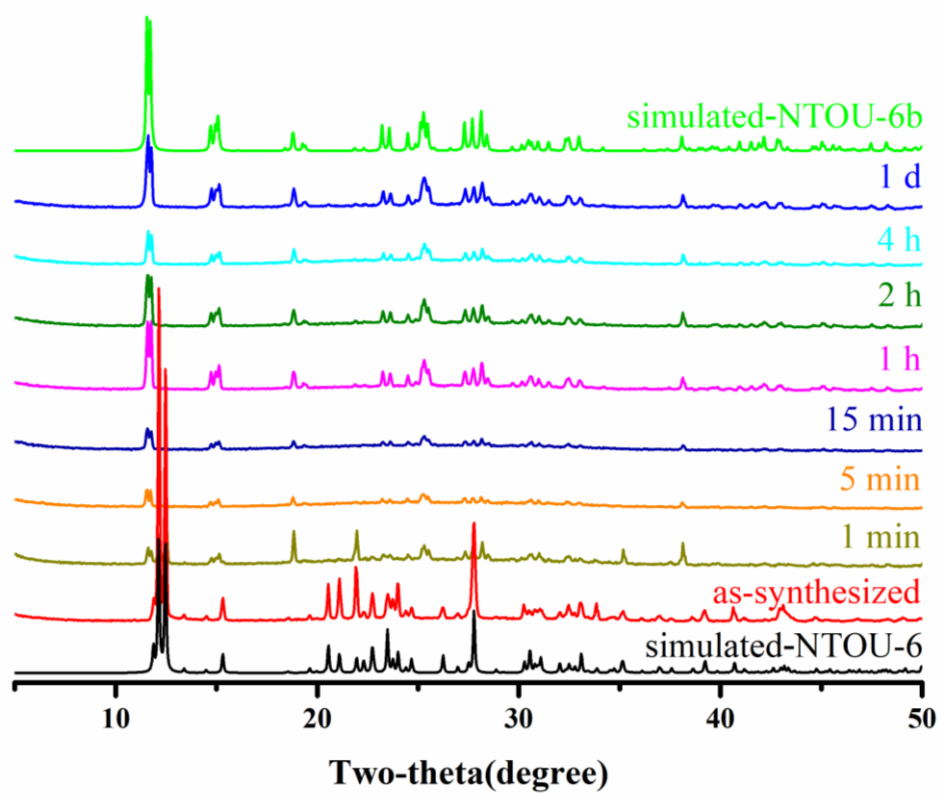

**Fig. S5** The X-ray powder patterns of NTOU-6 for the water-stability testing.

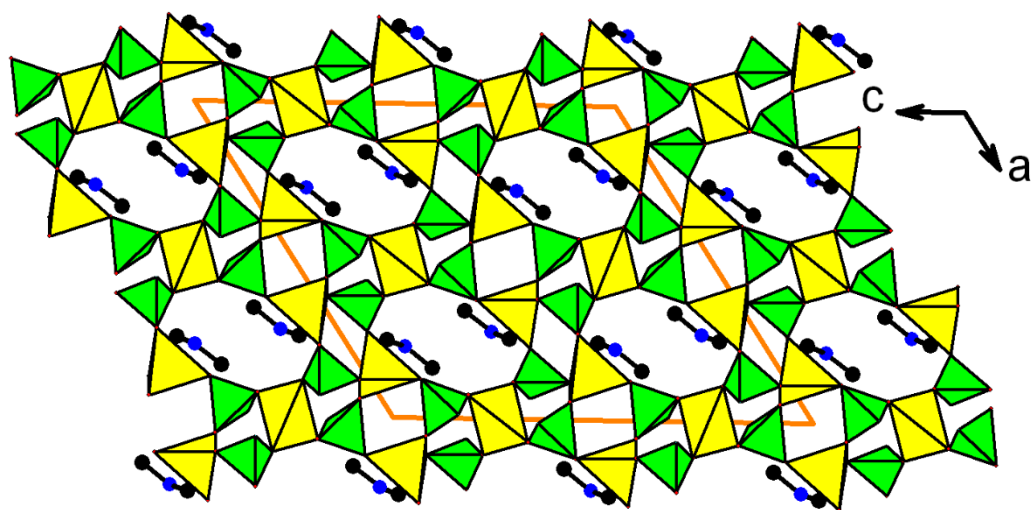

**Fig. S6** NTOU-6 with 4-, and 8- member rings along *b* axis.

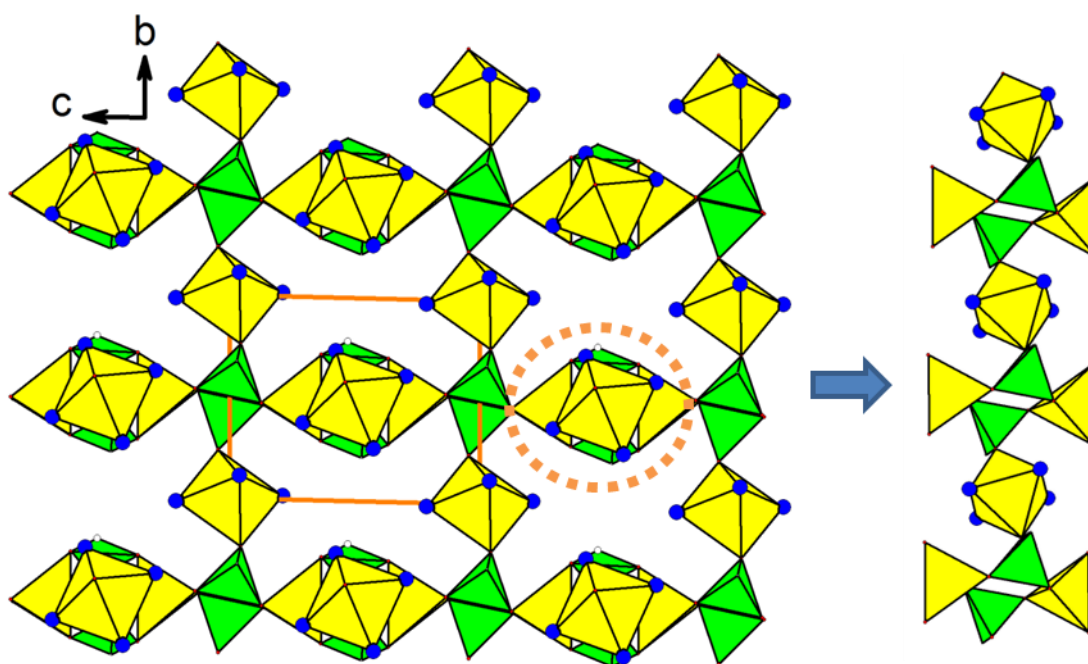

**Fig. S7** The 12-membered rings in compound **NTOU-6b** made up of two  $[\text{ZnO}_2(\text{H}_2\text{O})_4]^{2-}$  groups, four  $\text{ZnO}_4$  units, and six  $\text{HPO}_3$  tetrahedra.

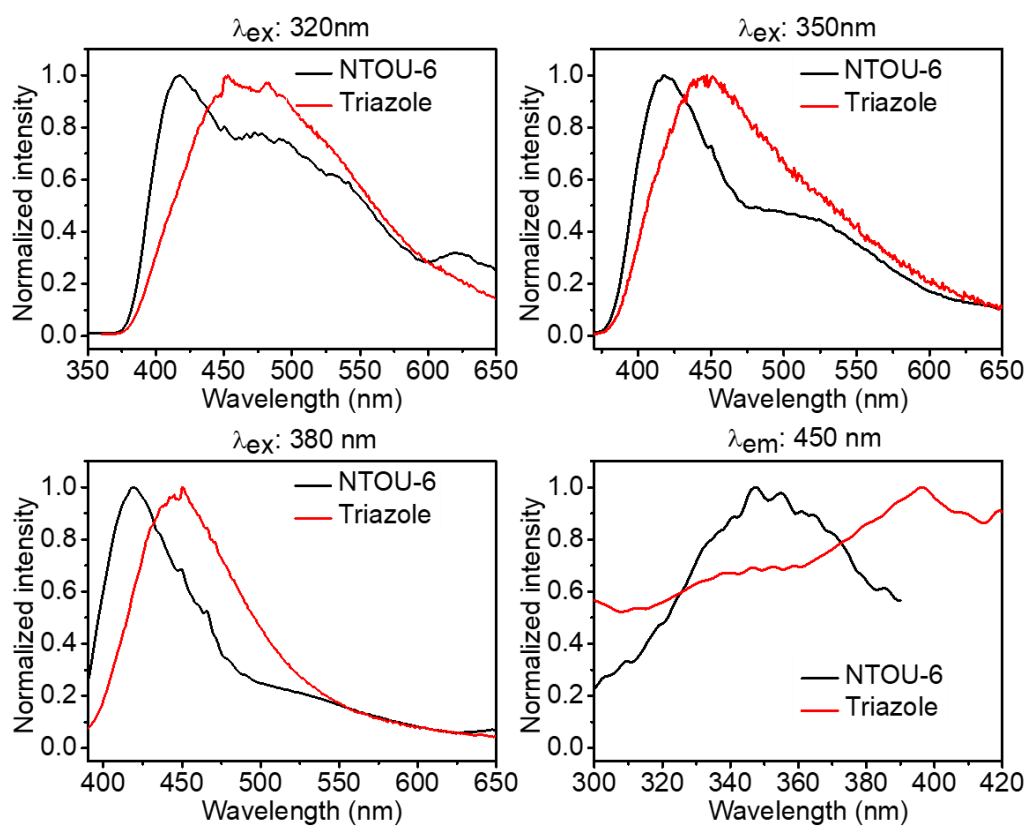

**Fig. S8** Comparison of the emission and excitation spectra for the title compound and triazole molecules.

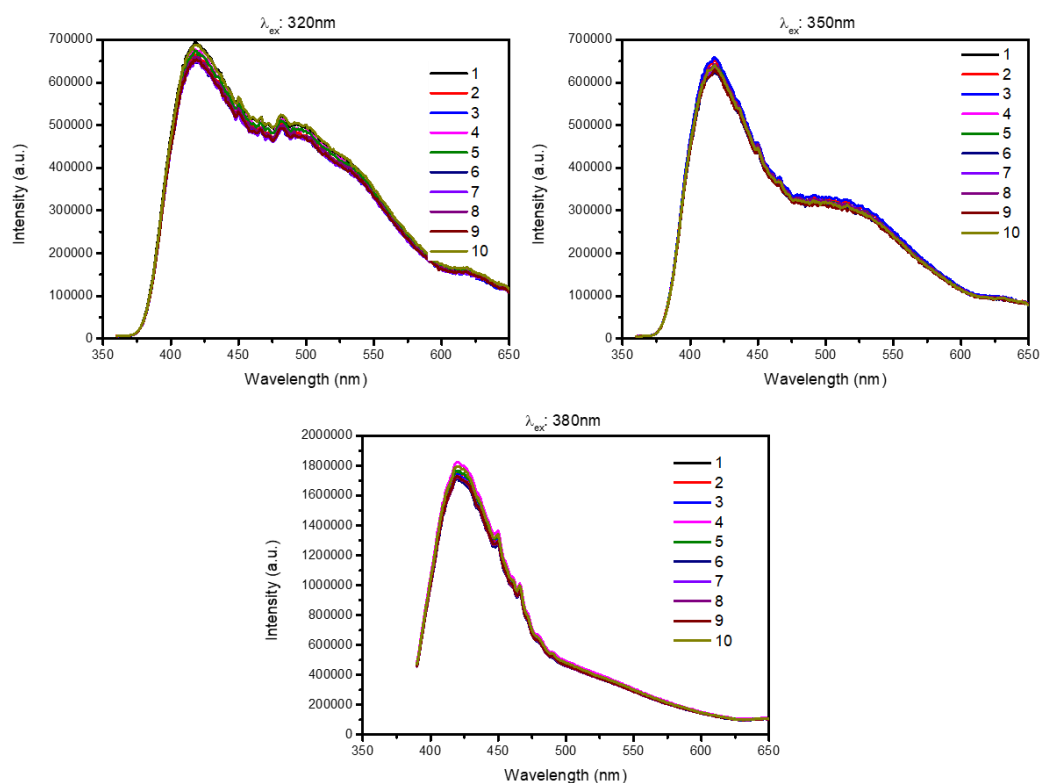

**Fig. S9** Emission spectra of repeated excitation showing the photostability of NTOU-6.

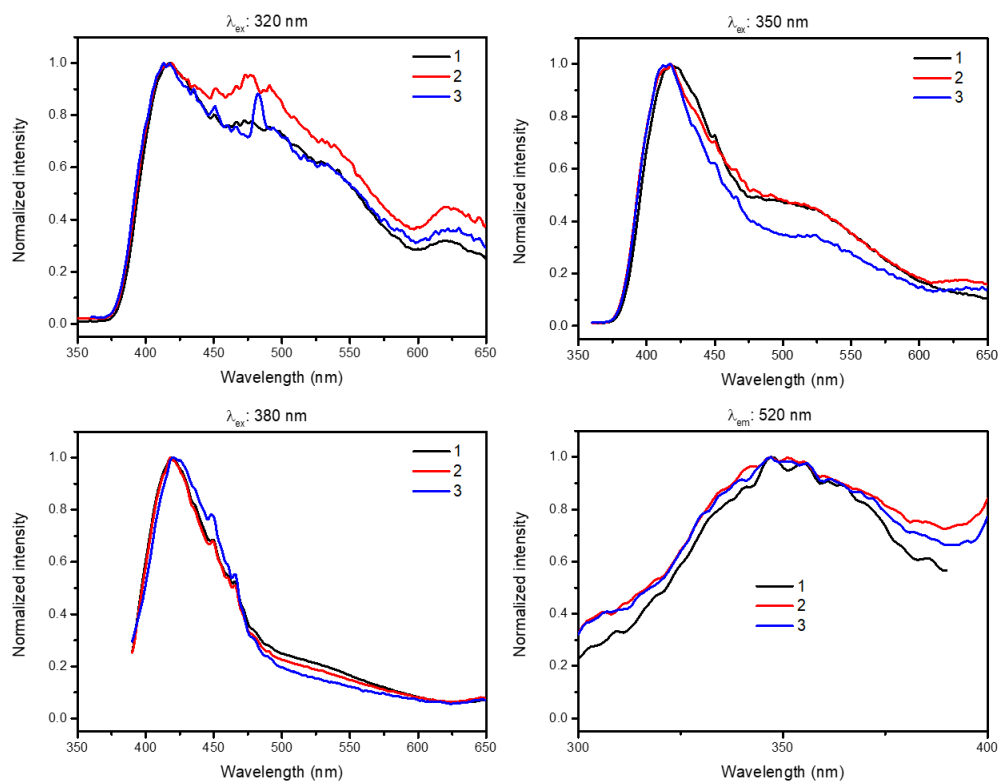

**Fig. S10** Reproducibility test for NTOU-6 at different excitation wavelengths by using different batches.

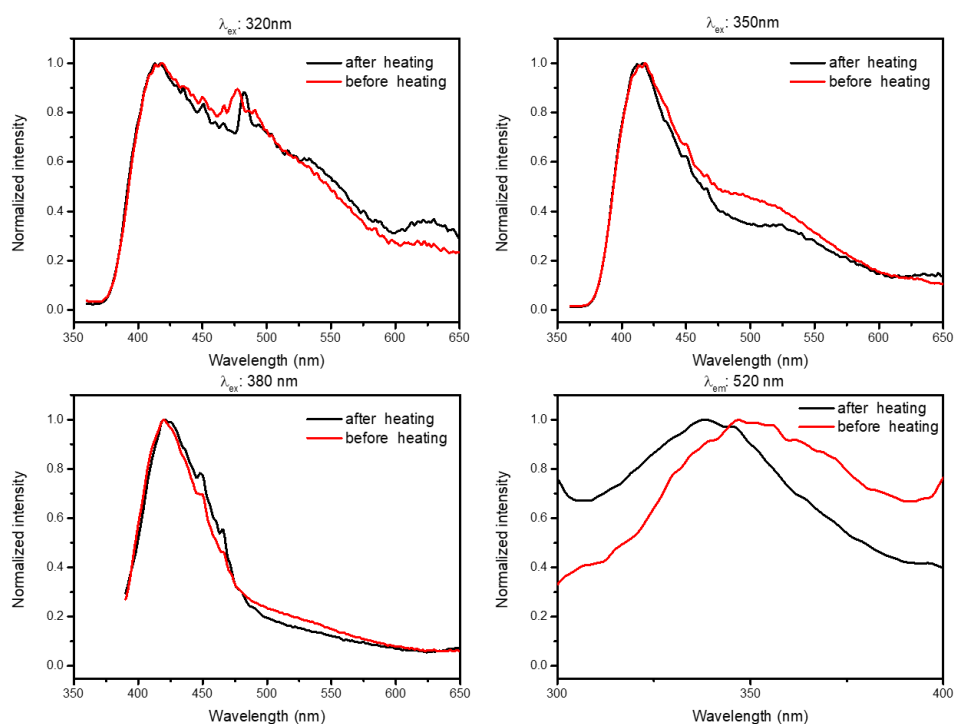

**Fig. S11** Thermostability test on **NTOU-6** by comparing the emission spectra before and after heating. Experimental conditions: the compound was heated to 100°C and held for 1 hour, then cooled to room temperature before recording the fluorescence spectra.

**Table S1.** The lifetime for **NTOU-6** and triazole ligands in the solid state.

| Compound | Ex: 350 nm/<br>Em: 420 nm | Ex: 350 nm/<br>Em: 520 nm |
|----------|---------------------------|---------------------------|
| NTOU-6   | 1.75 ns                   | 0.9 $\mu$ s               |
|          | $\chi^2$ : 1.29           | $\chi^2$ : 1.20           |
| Triazole | 2.79 ns                   | 3.58 ns                   |
|          | $\chi^2$ : 1.25           | $\chi^2$ : 1.33           |
